# Supplementary material for: The Genetic Structure of Marijuana and Hemp
Source: PubMed Central journal article supplement (PMC4550350; doi:10.1371/journal.pone.0133292), 2015-08-26

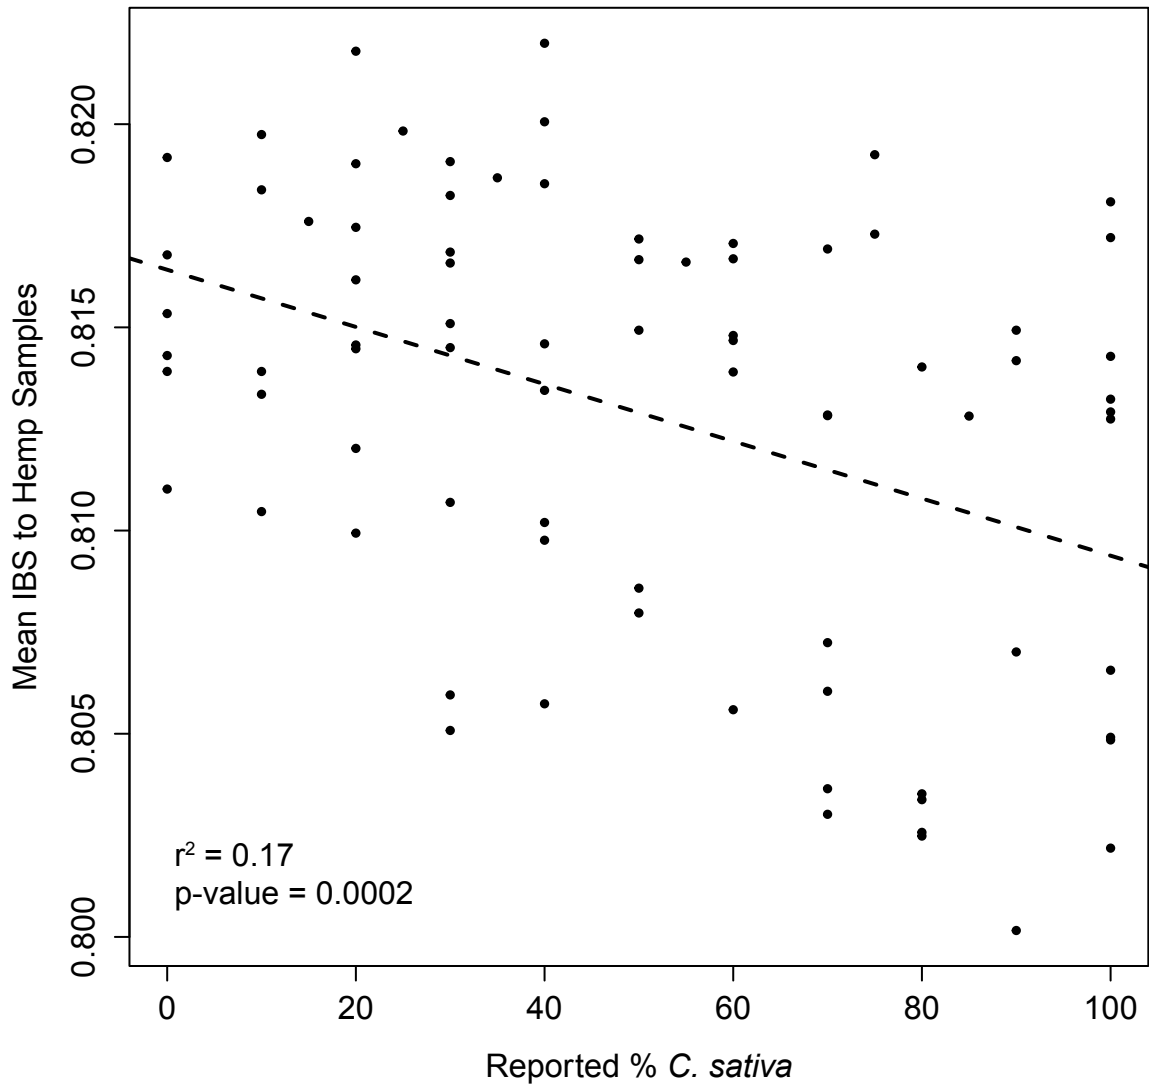

Supplement: pone.0133292.s002.pdf [file pone.0133292.s002.pdf]
