# Supplementary material for: The Genetic Structure of Marijuana and Hemp
Source: PLoS One. 2015 Aug 26;10(8):e0133292. doi: 10.1371/journal.pone.0133292 (PMC4550350; doi:10.1371/journal.pone.0133292)
Supplement: S3 Table — (XLSX) [file pone.0133292.s005.xlsx]

## Sheet: 141126_metadat_finalsampleset.t
Sample ID	Sample Name	Sample Origin	Website or contact information
P1_A02_H_0001_2	Felina	Alberta Innovates	http://www.albertatechfutures.ca
P1_A04_H_0002_2	Ferimon	Alberta Innovates	http://www.albertatechfutures.ca
P1_A06_H_0003_2	Kompolti	Alberta Innovates	http://www.albertatechfutures.ca
P1_A08_H_0004_2	Uniko B	Alberta Innovates	http://www.albertatechfutures.ca
P1_A10_H_0005_2	Fedora 19	Alberta Innovates	http://www.albertatechfutures.ca
P1_A11_H_0006_1	Futura 77	Alberta Innovates	http://www.albertatechfutures.ca
P1_B01_H_0007_1	Fedrina	Alberta Innovates	http://www.albertatechfutures.ca
P1_B04_H_0008_2	Suditalien or Sudi	Alberta Innovates	http://www.albertatechfutures.ca
P1_B05_H_0009_1	LKSD or LKCSD	Alberta Innovates	http://www.albertatechfutures.ca
P1_B09_H_0011_1	Bialobrzeskie	Alberta Innovates	http://www.albertatechfutures.ca
P1_B12_H_0012_2	VIR 541	Alberta Innovates	http://www.albertatechfutures.ca
P1_C01_H_0013_1	VIR 569	Alberta Innovates	http://www.albertatechfutures.ca
P1_C04_H_0014_2	VIR 575	Alberta Innovates	http://www.albertatechfutures.ca
P1_C05_H_0015_1	Silesia	Alberta Innovates	http://www.albertatechfutures.ca
P1_C08_H_0016_2	VIR 577	Alberta Innovates	http://www.albertatechfutures.ca
P1_C10_H_0017_2	Carmagnola	Alberta Innovates	http://www.albertatechfutures.ca
P1_D02_H_0019_2	Zolotonsha 15	Alberta Innovates	http://www.albertatechfutures.ca
P1_D03_H_0020_1	Fedora 17	Alberta Innovates	http://www.albertatechfutures.ca
P1_D05_H_0021_1	K110	Alberta Innovates	http://www.albertatechfutures.ca
P1_D07_H_0022_1	Novosadska	Alberta Innovates	http://www.albertatechfutures.ca
P1_D09_H_0023_1	Jus 8	Alberta Innovates	http://www.albertatechfutures.ca
P1_E01_H_0025_1	Delores	Alberta Innovates	http://www.albertatechfutures.ca
P1_E03_H_0026_1	Petera	Alberta Innovates	http://www.albertatechfutures.ca
P1_E05_H_0027_1	CAN 29/94	Alberta Innovates	http://www.albertatechfutures.ca
P1_E07_H_0028_1	CAN 37/97	Alberta Innovates	http://www.albertatechfutures.ca
P1_E10_H_0029_2	CAN 40/99	Alberta Innovates	http://www.albertatechfutures.ca
P1_F03_H_0032_1	CAN 39/98	Alberta Innovates	http://www.albertatechfutures.ca
P1_F06_H_0033_2	CAN 100/01	Alberta Innovates	http://www.albertatechfutures.ca
P1_F07_H_0034_1	CAN 18/95	Alberta Innovates	http://www.albertatechfutures.ca
P1_F09_H_0035_1	CAN 20/02	Alberta Innovates	http://www.albertatechfutures.ca
P1_F11_H_0036_1	CAN 24/89	Alberta Innovates	http://www.albertatechfutures.ca
P1_G01_H_0037_1	CAN 23/99	Alberta Innovates	http://www.albertatechfutures.ca
P1_G04_H_0038_2	CAN 17/95	Alberta Innovates	http://www.albertatechfutures.ca
P1_G05_H_0039_1	CAN 19/87	Alberta Innovates	http://www.albertatechfutures.ca
P1_G07_H_0040_1	CAN 22/88	Alberta Innovates	http://www.albertatechfutures.ca
P1_G10_H_0041_2	CAN 26/93	Alberta Innovates	http://www.albertatechfutures.ca
P1_G11_H_0042_1	CAN 16/94	Alberta Innovates	http://www.albertatechfutures.ca
P1_H02_H_0044_1	CAN 28/01	Alberta Innovates	http://www.albertatechfutures.ca
P1_H04_H_0045_1	Chameleon	Alberta Innovates	http://www.albertatechfutures.ca
P1_H07_H_0046_2	Tygra	Alberta Innovates	http://www.albertatechfutures.ca
P1_H09_H_0047_2	Carmen	Alberta Innovates	http://www.albertatechfutures.ca
P1_H10_H_0048_1	Alyssa	Alberta Innovates	http://www.albertatechfutures.ca
P2_H12_H_0096	Finola	Alberta Innovates	http://www.albertatechfutures.ca
